# Supplementary material for: Physiological and transcriptomic responses of Lanzhou Lily (Lilium davidii, var. unicolor) to cold stress
Source: PLoS One. 2020 Jan 23;15(1):e0227921. doi: 10.1371/journal.pone.0227921 (PMC6977731; doi:10.1371/journal.pone.0227921)
Supplement: S1 Table — (XLSX) [file pone.0227921.s001.xlsx]

## Sheet: Sheet1
S1 Table.Primers used for qRT-PCR analysis.
Gene ID	KEGG Pathways	Forward primer sequence (5'→3')	Reverse primer sequence (3'→5')	Description
c151318_g1	Photosynthesis, Metabolic pathways	GGCCTTCGATGCATCATC	GATGCTCTCTTTCACCGGC	Cytochrome b6/f complex subunit IV (chloroplast) [Cephalanthera longifolia]
c171769_g1	Photosynthesis, Metabolic pathways	GCCGCCTCGCCATGTTCTCT	GGGCGAAGTTGGTGGCGAAA	Photosystem I P700 apoprotein A1 (chloroplast) [Microlaena stipoides]
c133035_g1	Photosynthesis, Metabolic pathways	ATGGAAGCAATCACCTAAGT	CAACATCATCAACTCTGG	Hypothetical protein VIGAN_05107500 [Vigna angularis var. angularis]
c198283_g1	Photosynthesis, Metabolic pathways	GCCAGCAGAACAGTCAAG	TCCAGTCCACCACAGTCT	ATP synthase CF1 alpha subunit (chloroplast) [Tricyrtis macropoda]
c237057_g1	Photosynthesis, Metabolic pathways	GAAAGGTGCATTGTAGGCTC	ATGCCCTTGTAAACGTCTTC	Predicted: glyceraldehyde-3-phosphate dehydrogenase GAPCP2, chloroplastic-like [Erythranthe guttata]
c76799_g1	Photosynthesis	GGCGCGAGTACGAGCTGGTGA	CGCCTCGTCGGTCTTGTCGG	Predicted: glyceraldehyde-3-phosphate dehydrogenase 2, cytosolic [Phoenix dactylifera]
c121911_g1	Photosynthesis, Metabolic pathways, Oxidative phosphorylation	CTAGACTCCGCACTCTGT	GTTGAGCCAGCCTACATC	Predicted: photosystem I reaction center subunit III, chloroplastic-like [Gossypium hirsutum]
c145285_g1	Metabolic pathways, Biosynthesis of amino acids, Glycolysis / Gluconeogenesis, Biosynthesis of secondary metabolites, Carbon metabolism, Carbon fixation in photosynthetic organisms	CAATTGCTTCGCTGCCCGTTAT	GAACGTCACCGCAAAATCGATCA	Rieske iron-sulphur protein precursor [Pinellia ternata]
c105074_g2	Metabolic pathways, Biosynthesis of secondary metabolites, Biosynthesis of amino acids, Glycolysis / Gluconeogenesis, Carbon metabolism, Carbon fixation in photosynthetic organisms	GAGAACCAGGGAAAGGTAGATG	TCTCACTCAGCGACTCAGC	Cytochrome c6 [Zea mays]
c158889_g1	Carbon fixation in photosynthetic organisms	GCAAGCAAAGCCTTGGATC	ATTGCCGGAGATCAAACG	Predicted: sedoheptulose-1,7-bisphosphatase, chloroplastic [Solanum pennellii]
Actin	None	TGAGCACATTCCAGCAGA	CCATAGACAAAGCCATCG	None
Note: 10 DEGs were divided into two groups, photosynthesis (red) and carbon fixation in photosynthetic organisms (blue), according to their commom terms.
